# Supplementary material for: Microwave-assisted pyrolysis and analytical fast pyrolysis of macroalgae: product analysis and effect of heating mechanism
Source: Royal Society of Chemistry journal article supplement (doi:10.1039/c9se00162j), 2019-01-01
Supplement: c9se00162j1.pdf [file c9se00162j1.pdf]

**Microwave-Assisted Pyrolysis and Analytical Fast Pyrolysis of Macroalgae:  
Product Analysis and Effect of Heating Mechanism**

Ribhu Gautam,<sup>1</sup> S. Shyam,<sup>1</sup> B. Rajasekhar Reddy,<sup>1</sup> Kasivelu Govindaraju<sup>2</sup> and R. Vinu<sup>1,\*</sup>

*<sup>1</sup>Department of Chemical Engineering, National Center for Combustion Research and  
Development, Indian Institute of Technology Madras, Chennai–600036, India*

*<sup>2</sup> Centre for Ocean Research, Sathyabama Institute of Science and Technology, Chennai–  
600119, India*

---

---

\*Corresponding Author: Dr. R. Vinu, Email: [vinu@iitm.ac.in](mailto:vinu@iitm.ac.in), Phone: +91-44-22574187

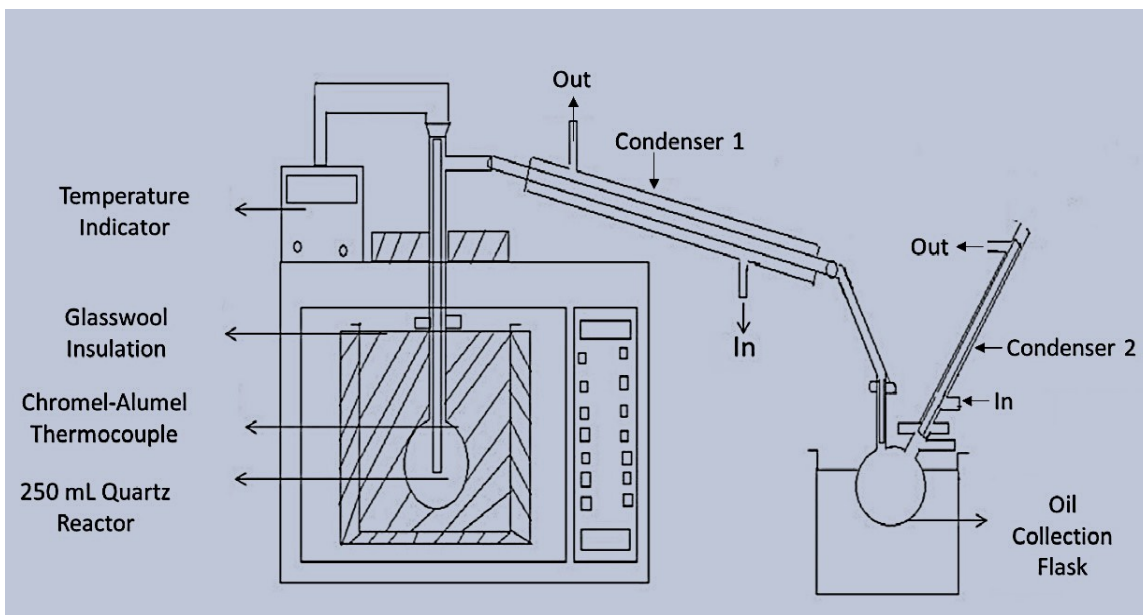

Figure S1. Schematic of the experimental setup used for microwave-assisted pyrolysis.

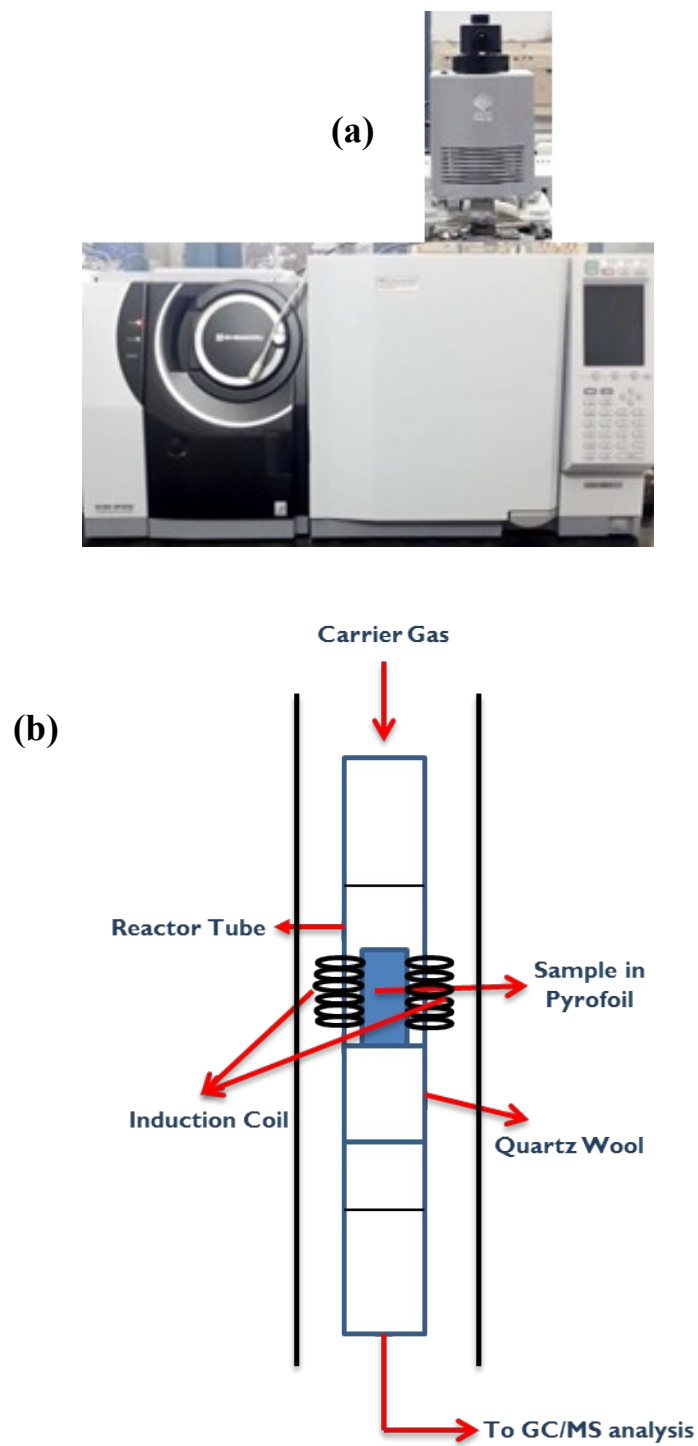

Figure S2. (a) Snapshot, and (b) schematic of JHI-07 Curie point pyrolysis-GC/MS system

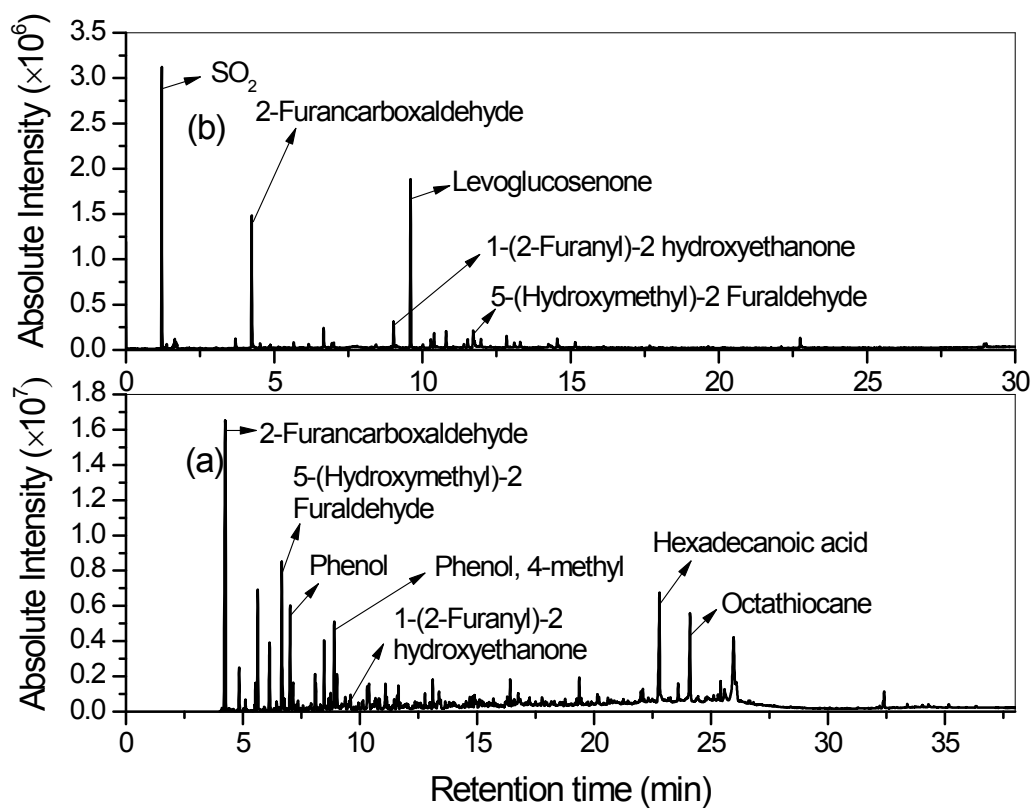

Figure S3. Total ion chromatograms obtained from (a) GC/MS of bio-oil from MAP of *K. alvarezii*, and (b) Py-GC/MS of *K. alvarezii*.

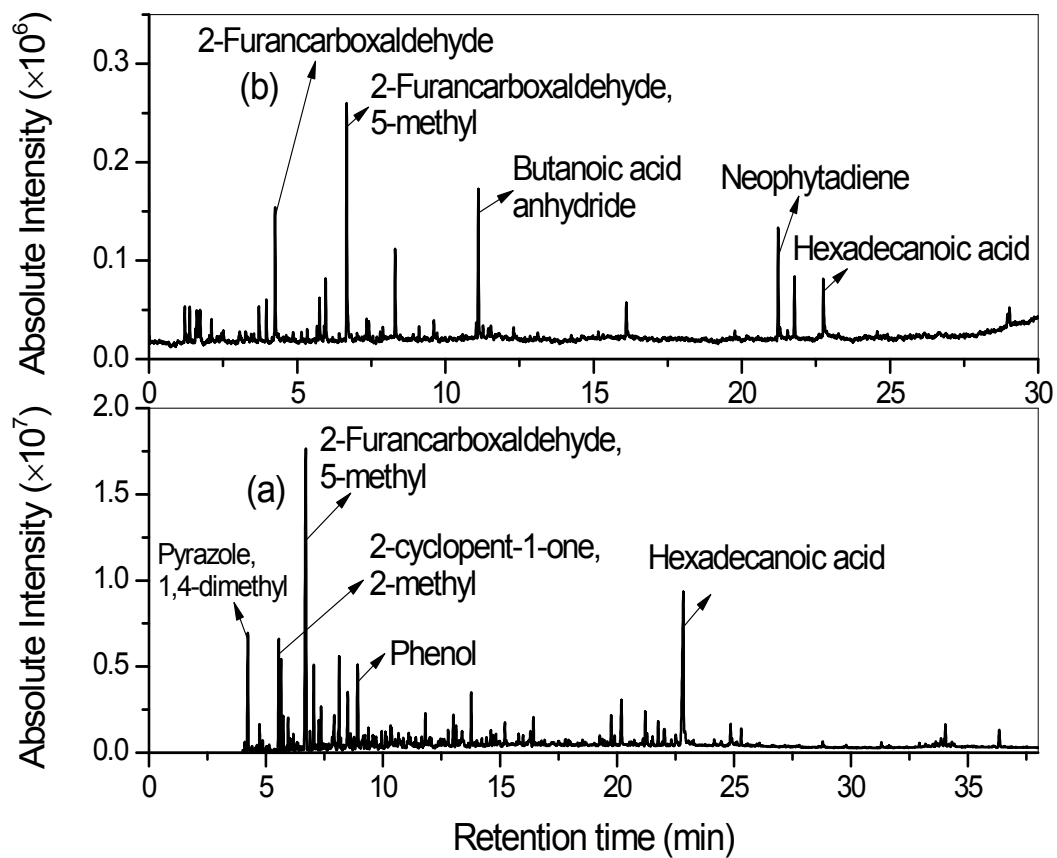

Figure S4. Total ion chromatograms obtained from (a) GC/MS of bio-oil from MAP of *S. wightii*, and (b) Py-GC/MS of *S. wightii*.

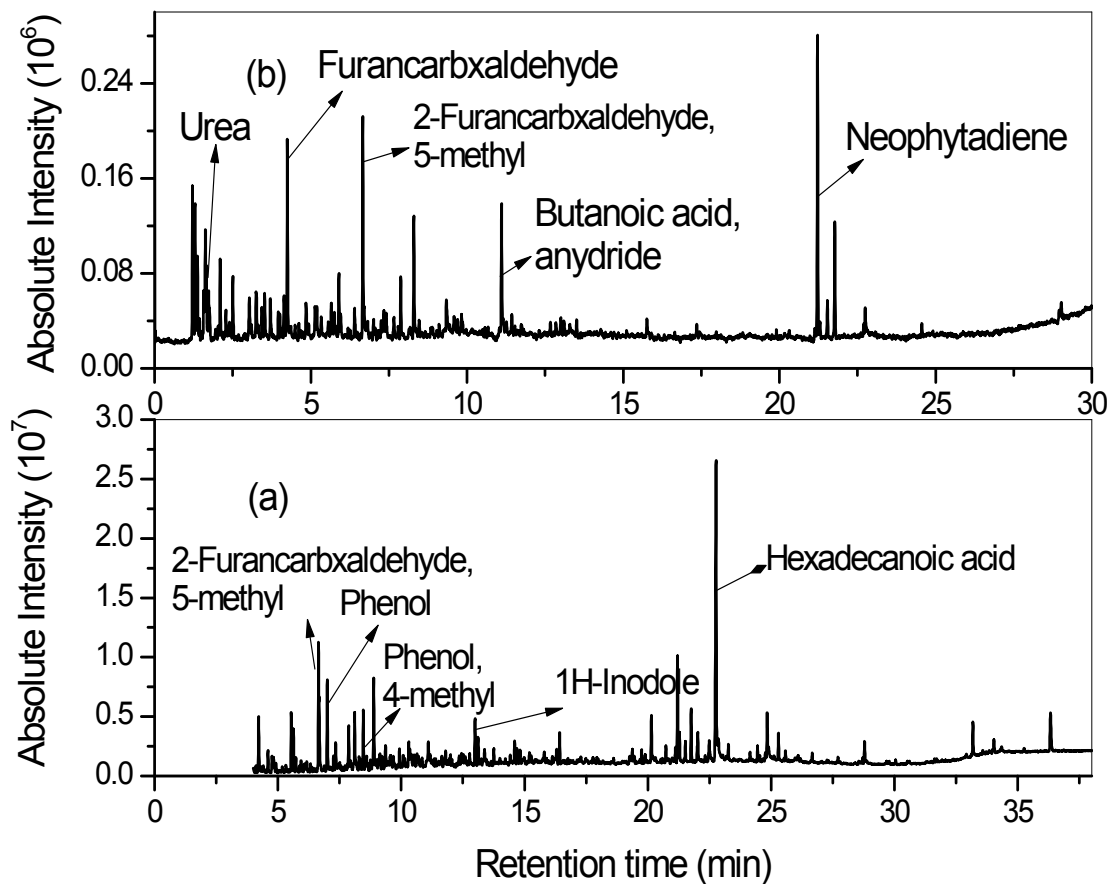

Figure S5. Total ion chromatograms obtained from (a) GC/MS of bio-oil from MAP of *T. ornata*, and (b) Py-GC/MS of *T. ornata*.

Table S1. Composition of pyrolysates obtained from microwave-assisted pyrolysis of the macroalgae. The data are presented as the mean  $\pm$  S.D, n = 3.

| Compounds                                                 | Selectivity %       |                  |                   |
|-----------------------------------------------------------|---------------------|------------------|-------------------|
|                                                           | <i>K. alvarezii</i> | <i>T. ornata</i> | <i>S. wightii</i> |
| <b>Alcohols</b>                                           |                     |                  |                   |
| Octadecanol                                               | 0.64 $\pm$ 0.03     |                  |                   |
| 1-Dodecanol, 3,7,11-trimethyl-                            |                     | 0.43 $\pm$ 0.02  | 0.9 $\pm$ 0.08    |
| 2-Hexadecen-1-ol, 3,7,11,15-tetramethyl-, [r-[r*r*-(e)]]- |                     | 1.84 $\pm$ 0.10  |                   |
| 1-Hexadecanol, 3,7,11,15-tetramethyl-                     |                     |                  | 0.16 $\pm$ 0      |
| <b>Aldehydes/ketones</b>                                  |                     |                  |                   |
| 4-Cyclopentene-1,3-dione #                                | 0.33 $\pm$ 0        |                  |                   |
| 2-Cyclopenten-1-one, 2-methyl-                            | 1.05 $\pm$ 0.13     | 1.83 $\pm$ 0.14  | 3.50 $\pm$ 0.45   |
| 2-Cyclohexen-1-one                                        |                     |                  | 0.56 $\pm$ 0.08   |
| 2-Cyclopenten-1-one, 3,4-dimethyl-                        |                     | 0.56 $\pm$ 0.06  | 0.80 $\pm$ 0.30   |
| 3,4-Dimethyl-2-cyclopenten-1-one                          | 0.24 $\pm$ 0.04     |                  | 0.86 $\pm$ 0.07   |
| Cyclohexanone, 4-methylene-                               | 0.2 $\pm$ 0         |                  |                   |
| 2-Cyclopenten-1-one, 2-hydroxy-3-methyl-                  |                     |                  | 1.68 $\pm$ 0.12   |
| 2-Cyclopenten-1-one, 2,3-dimethyl-                        | 0.76 $\pm$ 0.10     | 2.90 $\pm$ 0.33  | 4.63 $\pm$ 0.42   |
| 2-Cyclopenten-1-one, 2,3,4-trimethyl-                     |                     | 1.47 $\pm$ 0.14  | 1.14 $\pm$ 0.10   |
| Ethylcyclopentenolone                                     |                     | 0.38 $\pm$ 0.02  |                   |
| 1-Cyclohexene-4-carboxaldehyde, 1-methyl-                 |                     | 0.57 $\pm$ 0.08  |                   |
| 2-Pentadecanone, 6,10,14-trimethyl-                       |                     |                  | 0.98 $\pm$ 0.12   |
| Ethanone, 1-(2-hydroxyphenyl)-                            | 0.20 $\pm$ 0.02     |                  |                   |
| Ethanone, 1-(3-methylphenyl)-                             | 0.34 $\pm$ 0.04     |                  |                   |
| Cyclopentadecanone, 2-hydroxy-                            |                     |                  | 0.60 $\pm$ 0.05   |

| <b>Benzene derivatives</b>         |           |           |           |
|------------------------------------|-----------|-----------|-----------|
| p-xylene                           |           | 0.38±0.02 |           |
| Benzene, ethenyl-                  |           | 0.30±0    |           |
| Phenol                             | 3.80±0.04 | 3.12±0.20 | 3.23±0.12 |
| Phenol, 2-methyl-                  | 2.23±0.28 | 2.28±0.22 | 2.65±0.30 |
| Ethanone, 1-phenyl-                | 0.6±0.05  |           |           |
| 2-oxazolin-5-one, 2-phenyl-        |           | 0.40±0.04 |           |
| Phenol, 4-methyl-                  | 3.80±0.42 | 4.03±0.34 | 4.4±0.44  |
| 2,6-Dimethylphenol                 | 0.30±0.02 |           |           |
| Phenol, 3-ethyl-                   |           | 0.44±0.05 |           |
| Phenol, 2-ethyl-                   | 0.25±0.02 |           |           |
| Phenol, 2,4-dimethyl-              |           | 1.20±0.10 | 0.53±0.06 |
| Phenol, 3,4-dimethyl-              | 1.40±0.14 | 0.60±0.07 | 0.90±0.08 |
| Phenol, 2,6-dimethyl-              | 0.60±0.07 |           | 0.83±0.05 |
| 2-Methylindene                     |           | 0.40±0.02 |           |
| 1H-Indene, 1-methyl-               |           | 0.38±0.02 |           |
| Benzene, (1-methylene-2-propenyl)- |           | 0.50±0.04 |           |
| Phenol, 4-ethyl-                   | 0.28±0.02 | 0.30±0    | 0.28±0.0  |
| Phenol, 3,5-dimethyl-              | 0.26±0.02 |           |           |
| Phenol, 3,4,5-trimethyl-           |           | 0.42±0.03 |           |
| Naphthalene                        | 0.8±0.07  | 0.93±0.10 | 0.44±0.02 |
| 1,3-benzenediol                    |           | 0.55±0.06 |           |
| Benzene, 1-ethyl-4-methoxy-        | 0.23±0.12 |           |           |
| 1H-Indene, 4,7-dimethyl-           |           | 0.45±0.03 |           |
| Naphthalene, 1,2-dihydro-6-methyl- |           | 0.58±0.03 |           |
| Phenol, 2,4,5-trimethyl-           | 0.23±0.03 |           |           |
| Phenol, 3,4-dimethyl-,             |           | 0.20±0.10 |           |



|                                |            |           |            |
|--------------------------------|------------|-----------|------------|
| methylcarbamate                |            |           |            |
| Ethanone, 1-phenyl-            |            |           | 0.48±0.04  |
| Trimethylphenol (2,3,5)        |            |           | 0.23±0     |
| 1H-Inden-1-one, 2,3-dihydro-   | 0.44±0.02  | 0.3±0.02  |            |
| 2-Methylnaphthalene            | 1.09±0.12  |           |            |
| 4-Hydroxy-3-methylacetophenone | 0.3±0.02   |           |            |
| Naphthalene, 1-methyl-         | 0.60±0.05  | 1.68±0.10 | 1.34±0.12  |
| 1,1'-Biphenyl                  | 0.3±0.02   |           |            |
| (Z)-3-Phenyl-2-propenoic acid  | 0.45±0.02  |           |            |
| Naphthalene, 1,7-dimethyl-     | 0.33±0.04  |           |            |
| Naphthalene, 2,6-dimethyl-     | 0.24±0     |           |            |
| 1,4-Dimethylnaphthalene        |            | 0.42±0.05 |            |
| Acenaphthylene                 | 0.30±0.1   |           |            |
| 1-Naphthalenol                 | 0.22±0.01  |           |            |
| 1-Naphthalenol, 2-methyl-      | 0.40±0.04  |           |            |
| Anthracene                     | 0.24±0.02  |           |            |
| <b>Carboxylic acids</b>        |            |           |            |
| Tetradecanoic acid             | 0.27±0.01  | 1.63±0.14 | 2.17±0.24  |
| Myristoleic acid               |            | 1.13±0.10 |            |
| Hexadecanoic acid              | 6.02±0.25  | 14.4±1.30 | 10.74±0.93 |
| 6-Octadecenoic acid, (Z)-      |            | 2.00±0.20 |            |
| <b>Furan derivatives</b>       |            |           |            |
| 2-Furancarboxaldehyde          | 18.78±1.10 |           |            |
| 2-Furanmethanol                |            |           | 0.22±0.12  |
| Furan, 2-ethyl-                |            |           | 0.38±0.10  |
| Ethanone, 1-(2-furanyl)-       | 4.30±0.47  | 1.76±0.10 | 2.93±0.30  |
| 2(3H)-Furanone, 5-methyl-      |            |           | 0.30±0.02  |

|                                            |           |           |            |
|--------------------------------------------|-----------|-----------|------------|
| 2(5H)-Furanone, 5-methyl-                  | 4.56±0.23 |           |            |
| 2(3H)-Furanone, dihydro-5-methyl-          | 0.4±0.04  |           |            |
| 2-Furancarboxaldehyde, 5-methyl-           | 6.47±0.84 | 7.00±0.47 | 19.14±1.30 |
| 2(5H)-Furanone, 3-methyl-                  |           |           | 0.48±0.08  |
| Ethanone, 1-(5-methyl-2-furanyl)-          | 1.13±0.20 |           |            |
| Methyl-2(5H)-furanone                      |           |           | 0.37±0.05  |
| [(Furan-2-carbonyl)methylamino]acetic acid |           |           | 0.46±0.10  |
| Ethanone, 1-(2-furanyl)-2-hydroxy-         | 1.10±0.10 |           |            |
| Benzofuran, 2-methyl-                      | 0.53±0.06 |           |            |
| Benzofuran, 4,7-dimethyl-                  | 1.80±0.14 |           |            |
| 2-Tridecylfuran                            | 1.07±0.10 |           |            |
| <b>Hydrocarbons</b>                        |           |           |            |
| 2-Pentene, 3-ethyl-4,4-dimethyl-           |           |           | 0.33±0.10  |
| 1,3-Hexadiene, 3-ethyl-2-methyl-, (Z)-     |           | 1.07±0.14 |            |
| Tetradecane                                | 0.5±0.14  | 0.60±0.08 | 0.42±0.00  |
| Cyclopentane, nonyl-                       | 0.30±0.02 |           |            |
| 2,6,10-Trimethyltridecane                  |           | 0.26±0.10 | 0.5±0.08   |
| 1-Hexadecene                               | 0.50±0.03 | 0.37±0.02 | 0.35±0.04  |
| Pentadecane                                | 0.90±0    | 1.06±0.13 |            |
| Hexadecane                                 |           | 0.54±0.05 | 0.83±0.10  |
| Cyclopentane, decyl-                       | 0.20±0.10 |           |            |
| 1-Octadecene                               | 0.20±0.08 |           |            |
| Heptadecane                                | 0.95±0.10 | 0.45±0.02 |            |
| Nonadecane                                 |           |           | 0.30±0.07  |
| (2e)-3,7,11,15-Tetramethyl-2-hexadecene #  |           | 1.70±0.1  | 0.87±0.07  |
| Neophytadiene                              |           | 4.27±0.20 | 3.05±0.14  |

|                                               |           |           |
|-----------------------------------------------|-----------|-----------|
| Pentadecane, 8-hexyl-                         | 1.40±0.10 |           |
| Heneicosane                                   | 0.60±0.07 |           |
| Docosane                                      | 0.35±0.03 |           |
| Hexacosane                                    | 0.30±0.05 |           |
| <b>N-containing compounds</b>                 |           |           |
| Pyrazine, methyl-                             | 0.25±0.04 | 0.27±0.03 |
| Pyrazole, 1,4-dimethyl-                       |           | 5.24±0.20 |
| Pyridine, 3-methyl-                           | 0.70±0.07 | 1.08±0.18 |
| L-leucine, ethyl ester                        | 0.63±0.05 |           |
| 1H-Pyrrole, 2,5-dimethyl-                     |           | 0.22±0    |
| Pyridine, 2,4-dimethyl-                       |           | 0.36±0.04 |
| Pyridine, 2,3-dimethyl-                       |           | 0.22±0.07 |
| 2(1H)-Pyrimidinone                            | 0.40±0.02 |           |
| 1-Acetyl-1H-Imidazole                         |           | 0.35±0.05 |
| 1H-Pyrrole, 2-ethyl-4-methyl-                 | 0.40±0.04 |           |
| Ethanone, 1-(1H-pyrrol-2-yl)-                 |           | 0.28±0.04 |
| 2-[(Cyano-methyl-methyl)-amino]-propionitrile | 0.40±0.02 |           |
| Dihydroxy-5,6-dihydrouracil                   | 0.77±0.03 |           |
| Benzeneacetonitrile                           | 0.30±0.04 |           |
| Benzene, 1-isocyano-2-methyl-                 | 0.42±0.05 |           |
| 5,7-Dimethyl-1H-indazole                      |           | 0.33±0.12 |
| 2,5-Dimethyl-3-cis-propenylpyrazine           |           | 1.00±0.12 |
| Benzenepropanenitrile                         | 0.30±0.05 |           |
| 1H-Inden-1-one, 2,3-dihydro-                  |           | 0.40±0.02 |
| 1H-Indole                                     | 2.03±0.30 | 1.23±0.20 |
| 2,5,6-Trimethylbenzimidazole                  | 0.97±0.10 |           |

|                                                           |           |           |           |
|-----------------------------------------------------------|-----------|-----------|-----------|
| Pyrazine, trimethyl-1-propenyl-, (e)-                     |           | 0.64±0.08 | 1.76±0.17 |
| Indole, 3-methyl-                                         |           | 0.83±0.06 | 0.40±0.05 |
| 2-(1H-Indol-3-yl)ethanamine hydrochloride                 | 0.23±0.02 |           |           |
| Pyrrole-3-carbonitrile, 5-formyl-2,4-dimethyl-            | 0.45±0.07 |           |           |
| [1,2,4]-Triazolo[1,5-a]pyrimidine-2-carboxamide, n-butyl- |           |           | 0.70±0.06 |
| 2-Allyl-3,5-dimethylpyrazine                              |           |           | 0.32±0.05 |
| Benzonitrile, 2,4,6-trimethyl-                            |           | 0.3±0     |           |
| Tridecanenitrile                                          |           | 0.62±0.04 | 0.30±0.02 |
| Hexadecanenitrile                                         | 0.55±0.07 |           |           |
| Dodecanamide                                              |           | 0.74±0.05 | 0.55±0.04 |
| Hexadecanamide                                            | 0.2±0     | 0.92±0.07 | 0.54±0.03 |
| 3-Pyridinol, acetate (ester)                              | 0.36±0.04 |           |           |
| <b>Others</b>                                             |           |           |           |
| 3-Cyclopentene-1-acetaldehyde, 2-oxo-                     |           | 2.46±0.23 |           |
| 2-Cyclopenten-1-one, 2-hydroxy-3-methyl-                  |           | 1.64±0.14 |           |
| Formic acid, butyl ester                                  | 0.2±0     |           |           |
| 3,7-Dimethyl-6-octen-1-yl phenylacetate                   | 0.2±0     |           |           |
| 4H-Pyran-4-one, 3-hydroxy-2-methyl-                       |           | 0.6±0.04  |           |
| 2H-Pyran-2-carboxaldehyde, 3,4-dihydro-2,5-dimethyl-      | 0.9±0.07  |           |           |
| 1,4-Cyclohexadien, 6-isopropenyl-1,2,3,4-tetramethyl-     | 0.28±0    |           |           |
| Octathiocane                                              | 4.40±0.03 |           |           |
| Hexadecanoic acid, 2-hydroxy-1-(hydroxymethyl)ethyl ester |           | 0.82±0.07 |           |

---

2,2,4-Trimethyl-3-(3,8,12,16-  
tetramethyl-heptadeca-3,7,11,15-  
tetraenyl)-cyclohexanol

---

1.25±0.13

Table S2. Composition of pyrolysates obtained from Curie point analytical pyrolysis-GC/MS of the macroalgae. The data are presented as the mean  $\pm$  S.D, n = 3.

| Compounds                                        | Selectivity %       |                   |                  |
|--------------------------------------------------|---------------------|-------------------|------------------|
|                                                  | <i>K. alvarezii</i> | <i>S. wightii</i> | <i>T. ornata</i> |
| <b>Alcohols</b>                                  |                     |                   |                  |
| 1,2-Cyclohexanediol                              | 0.74 $\pm$ 0        |                   |                  |
| 2-Butanol, 3-(2,2-dimethylpropoxy)-              |                     |                   | 2.90 $\pm$ 0.35  |
| 1-Decanol                                        |                     |                   | 0.54 $\pm$ 0.02  |
| 1,3-Cyclopentanediol, trans-                     |                     |                   | 0.52 $\pm$ 0.12  |
| 1,2-Benzenediol                                  |                     |                   | 0.76 $\pm$ 0.14  |
| <b>Carbonyl compounds</b>                        |                     |                   |                  |
| 1,2-Cyclopentanedione                            |                     | 0.58 $\pm$ 0.10   | 1.55 $\pm$ 0.14  |
| 1,2-Cyclopentanedione, 3-methyl-                 | 0.25 $\pm$ 0.16     |                   |                  |
| 1,3-cyclopentanedione, 4-hydroxy-2-methyl-       |                     |                   | 0.62 $\pm$ 0.10  |
| 1-Phenyl-2-butanone                              |                     | 0.57 $\pm$ 0.03   |                  |
| 2,4-Pentanedione, 3-butyl-                       |                     |                   | 0.38 $\pm$ 0.07  |
| 2-Acetyl-4-hydroxybutyricacidlactone             |                     | 1.26 $\pm$ 0.04   | 0.80 $\pm$ 0.20  |
| 2-Butanone, 4-(7-methoxy-2-oxepanylidene)-, (e)- |                     |                   | 0.83 $\pm$ 0.08  |
| 2-Butenal                                        |                     | 0.20 $\pm$ 0.03   |                  |
| 2-Butenal, 3-methyl-                             |                     |                   | 0.38 $\pm$ 0.08  |
| 2-Cyclopenten-1-one, 2-hydroxy-3-methyl-         |                     | 0.60 $\pm$ 0      | 2.10 $\pm$ 0.27  |
| 3-Heptanone, 4-methyl-                           | 0.66 $\pm$ 0.23     | 0.36 $\pm$ 0.04   |                  |
| 3-Pentadecanone                                  | 1.32 $\pm$ 0.20     |                   |                  |
| 3-Pentanone, 2-methyl-                           |                     |                   | 0.50 $\pm$ 0.06  |
| 4-Cyclopentene-1,3-dione #                       |                     |                   | 0.60 $\pm$ 0.05  |

|                                                               |            |           |           |
|---------------------------------------------------------------|------------|-----------|-----------|
| 4-Octanone, 5-hydroxy-2,7-dimethyl-                           |            | 0.64±0.13 |           |
| 8-Methoxy-5,5,8-trimethyl-3-nonen-2-one                       | 0.20±0.06  |           |           |
| Butanal                                                       | 0.58±0     |           |           |
| Cyclobuta[1,2-d:3,4-d']bis[1,3]dioxole-2,5-dione, tetrahydro- |            | 0.95±0.03 |           |
| Cyclopent-2-en-1,4-dione                                      |            | 0.57±0.05 | 0.30±0    |
| Cyclopent-4-ene-1,3-dione                                     | 0.12±0     | 0.36±0.05 |           |
| Decanal                                                       |            | 0.48±0.02 |           |
| Ethanone, 1-(2,5-dihydroxyphenyl)-                            |            |           | 0.32±0.03 |
| Ethylcyclopentenolone                                         |            |           | 0.67±0.16 |
| Methyl vinyl ketone                                           | 0.86±0.06  |           |           |
| Pentanal                                                      |            |           | 1.10±0.10 |
| 2H-Pyran-2,6(3H)-dione                                        |            |           | 0.62±0.10 |
| 2H-Pyran-2-one                                                | 0.20±0.10  |           |           |
| 2H-Pyran-2-one, 6-heptyltetrahydro-                           |            | 0.58±0.07 | 0.66±0.13 |
| 4H-Pyran-4-one, 3-hydroxy-2-methyl-                           |            |           | 1.20±0.10 |
| 4H-Pyran-4-one, 5-hydroxy-2-methyl-                           | 0.14±0     |           |           |
| Benzeneacetaldehyde                                           | 0.17±0     |           |           |
| 3-Heptanone, 4-methyl-                                        |            | 0.36±0.04 |           |
| <b>Carboxylic Acids</b>                                       |            |           |           |
| 1,2-Benzenedicarboxylic acid                                  |            | 2.46±0.92 |           |
| 2,3-Dimethylfumaric acid                                      | 0.16±0.06  |           |           |
| Decanoic acid                                                 |            | 0.32±0.05 |           |
| Hexadecanoic acid                                             | 1.08±0.075 | 4.42±0.85 | 3.18±0.42 |
| Propanoic acid                                                |            |           | 0.90±0.10 |
| <b>Anhydrosugars</b>                                          |            |           |           |
| Levogluosenone                                                | 18.23±1.77 | 1.60±0.06 |           |

|                                               |            |            |           |
|-----------------------------------------------|------------|------------|-----------|
| 1,6-Anhydro-.beta.-d-talopyranose             | 0.53±0.13  | 0.35±0.06  |           |
| 1,6-Anhydro-.alpha.-d-galactofuranose         | 0.23±0.20  |            |           |
| D-Allose                                      | 0.34±0.02  | 1.40±0.13  |           |
| Levoglucofan                                  | 1.04±0.03  | 1.17±0.10  |           |
| <b>Furan Derivatives</b>                      |            |            |           |
| (5z)-5-(2-Hydroxyethylidene)-2(5H)-furanone # | 0.37±0     |            |           |
| 1-(2-Furanyl)-2-hydroxyethanone               | 3.45±0.40  |            |           |
| 1-(2-Furyl)-2-butanone                        |            |            | 1.80±0.34 |
| 1-Propanone, 1-(2-furanyl)-                   | 0.67±0.10  |            |           |
| 2(3H)-Furanone, 5-ethenyldihydro-5-methyl-    |            |            | 0.53±0    |
| 2(3H)-Furanone, 5-ethyldihydro-               |            |            | 0.85±0.12 |
| 2(3H)-Furanone, 5-methyl-                     | 0.74±0.14  |            |           |
| 2(5H)-Furanone, 3-methyl-5-methylene-         |            |            | 0.38±0.02 |
| 2-Furancarboxaldehyde                         | 14.86±1.15 | 5.90±0.18  | 3.97±0.65 |
| 2-Furancarboxaldehyde, 5-methyl-              | 2.74±0.05  | 16.75±0.30 | 6.26±0.72 |
| 2-Furanmethanol                               | 0.11±0.02  |            |           |
| 2-Furanmethanol, tetrahydro-                  |            | 0.45±0.07  | 0.72±0.14 |
| 2-Methyl-3-(methylthio) furan                 |            |            | 3.04±0.20 |
| 2-Propylfuran                                 | 0.16±0.04  |            |           |
| 2-Tridecylfuran                               | 0.13±0.05  |            |           |
| 3,4-Furandimethanol                           | 0.14±0.01  |            |           |
| 3-Furaldehyde                                 |            | 1.48±0.18  | 0.64±0.11 |
| 5-(Hydroxymethyl)-2-furaldehyde               | 2.69±0.36  |            |           |
| 5-Formyl-2-furfurylmethanoate                 | 1.15±0.04  |            |           |
| 5-oxo-Tetrahydro-furan-2-carboxylic acid      |            |            | 0.55±0.02 |
| Ethanone, 1-(2-furanyl)-                      | 0.67±0.03  |            |           |



|                                                           |           |           |           |
|-----------------------------------------------------------|-----------|-----------|-----------|
| Ethanone, 1-(3-hydroxy-2-furanyl)-                        | 0.59±0.04 |           |           |
| Furan, 2-methyl-                                          |           | 1.78±0.18 |           |
| Furan, 3-methyl-                                          | 0.35±0    |           |           |
| Methyl hexofuranoside #                                   | 0.35±0.10 |           |           |
| <b>N-containing Compounds</b>                             |           |           |           |
| [4-(Aminomethyl)oxan-4-yl]methanol                        | 0.13±0    |           |           |
| 2,4-Imidazolidinedione, 5-methyl-5-(2-methylpropyl)-      | 1.08±0.27 |           |           |
| 2-Methyl-1,2-propanediamine                               |           | 0.36±0.02 |           |
| 3-Hexanamine                                              |           | 1.68±0    | 2.03±0.05 |
| 4-Pyridinol                                               |           |           | 1.50±0    |
| 5-Nonylamine                                              |           |           | 1.40±0.08 |
| 5-Pyrimidinecarboxaldehyde, 1,2,3,4-tetrahydro-2,4-dioxo- |           |           | 0.80±0.16 |
| 6-Azacytosine                                             |           | 0.50±0.10 |           |
| Diisopropylcyanamide                                      | 1.04±0.12 |           |           |
| Ethylamine, N,N-di(pentyl)-                               |           | 0.68±0.08 |           |
| Guanosine                                                 |           | 0.67±0.06 |           |
| Indolizine                                                |           |           | 0.60±0.12 |
| Methanamine, n,n-dimethyl-                                |           |           | 2.20±0.63 |
| Methanamine, n-methyl-n-nitroso-                          |           | 0.66±0.16 | 2.05±0.08 |
| N-tert-Butylethylamine                                    |           | 0.48±0.12 | 1.28±0.14 |
| Piperidine, 1-nitroso-                                    |           |           | 0.58±0.04 |
| Urea                                                      | 0.50±0.10 | 1.00±0.35 | 2.80±0.25 |
| 1H-Pyrrole, 2-methyl-                                     |           |           | 0.30±0.03 |
| 2-Acetyl-9-[3-deoxy-.beta.-d-ribofuranosyl]hypoxanthine   | 0.28±0.08 |           |           |
| 2H-Pyrazole-3-carboxylic acid, 2-methyl-                  | 0.16±0.03 |           |           |

|                                                               |           |           |            |
|---------------------------------------------------------------|-----------|-----------|------------|
| Pyrazine, methyl-                                             |           |           | 0.94±0.14  |
| Butanoic acid, 2,3-dimethyl-4-nitro-, 1,1-dimethylethyl ester | 1.36±0.06 |           |            |
| L-Alanine, N-methoxycarbonyl-, isobutyl ester                 |           |           | 1.02±0.03  |
| L-leucine, ethyl ester                                        |           |           | 1.23±0.16  |
| <b>Hydrocarbons</b>                                           |           |           |            |
| Cyclohexene, 3,5,5-trimethyl-                                 | 0.52±0.03 |           |            |
| Cyclohexane, 1,1'-[1,2-ethenediyl]bis-                        | 0.30±0.12 | 7.55±1.12 |            |
| 3-Hexene, (z)-                                                |           | 1.20±0.43 | 0.38±0.02  |
| Neophytadiene                                                 |           |           | 11.37±0.13 |
| Squalene                                                      | 0.53±0.04 |           |            |
| <b>Others Oxygen Containing Compounds</b>                     |           |           |            |
| 1,2-Ethanediol, diformate                                     |           | 1.92±0.13 | 0.94±0.10  |
| 1,3-Dioxolane, 2,2-dimethyl-4,5-di-1-propenyl-                |           | 0.30±0.10 | 0.48±0     |
| 1,4-Dioxadiene                                                | 1.14±0.03 | 0.48±0.10 | 1.00±0.08  |
| 2,4-Pentadienoic acid, 1-cyclopenten-3-on-1-yl ester          | 0.46±0.02 | 0.64±0.13 |            |
| 2-Heptanol, acetate                                           | 0.90±0.03 |           |            |
| Benzeneacetic acid, 1,1-dimethylethyl ester                   |           | 6.97±0.10 | 1.78±0.16  |
| Butane, 1,2:3,4-diepoxy-, (+/-)-                              |           | 0.40±0.10 | 1.14±0.16  |
| cis-2,3-Epoxyheptane                                          | 0.23±0.08 | 0.56±0.15 |            |
| Formic acid, butyl ester                                      | 0.90±0.05 |           |            |
| Methyl 4-pentenyl ether                                       | 0.72±0.10 |           |            |
| Oxazolidine, 2,2-diethyl-3-methyl-                            |           | 0.93±0.05 |            |
| Pent-2-enoic acid ethyl ester                                 |           |           | 0.42±0     |
| Proceroside                                                   |           | 3.90±0.26 |            |

|                                                      |            |           |           |
|------------------------------------------------------|------------|-----------|-----------|
| Vinyl butyrate                                       |            |           | 1.07±0.28 |
| 2H-Pyran-2-carboxaldehyde, 3,4-dihydro-2,5-dimethyl- | 1.02±0.06  |           |           |
| Isosorbide                                           | 0.40±0     |           |           |
| Octanoic acid, pyrrolidide                           | 0.32±0.13  |           |           |
| 2-Propenoic acid, 2-propenyl ester                   |            |           | 1.28±0.04 |
| 2-Propenoic acid, methyl ester                       |            |           | 0.63±0.12 |
| <b>Sulfur dioxide</b>                                | 22.98±2.60 | 1.57±0.32 | 2.08±0.16 |
